# Supplementary material for: Emergence of High-Level Cefiderocol Resistance in Carbapenem-Resistant Klebsiella pneumoniae from Bloodstream Infections in Patients with Hematologic Malignancies in China
Source: PubMed Central journal article supplement (PMC9045219; doi:10.1128/spectrum.00084-22), 2022-03-24
Supplement: spectrum00084-22_supp_1_seq8.pdf [file spectrum00084-22_supp_1_seq8.pdf]

## Supplemental Online Content

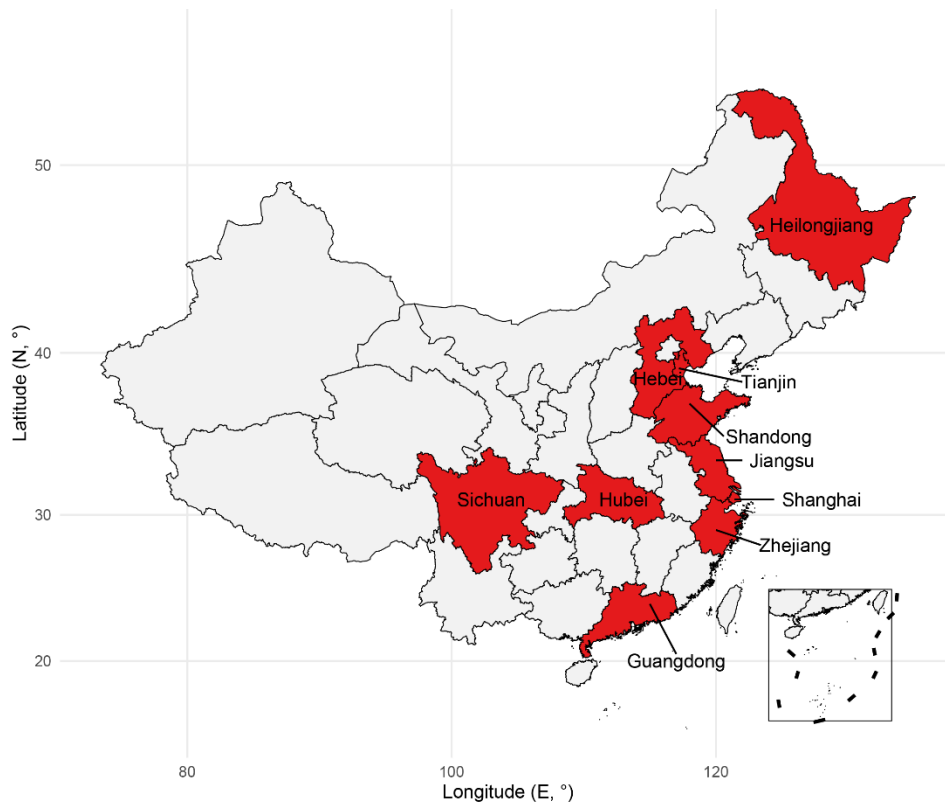

**Figure S1** *K. pneumoniae* strains in this study were identified from 10 provinces/cities, which are highlighted with red.

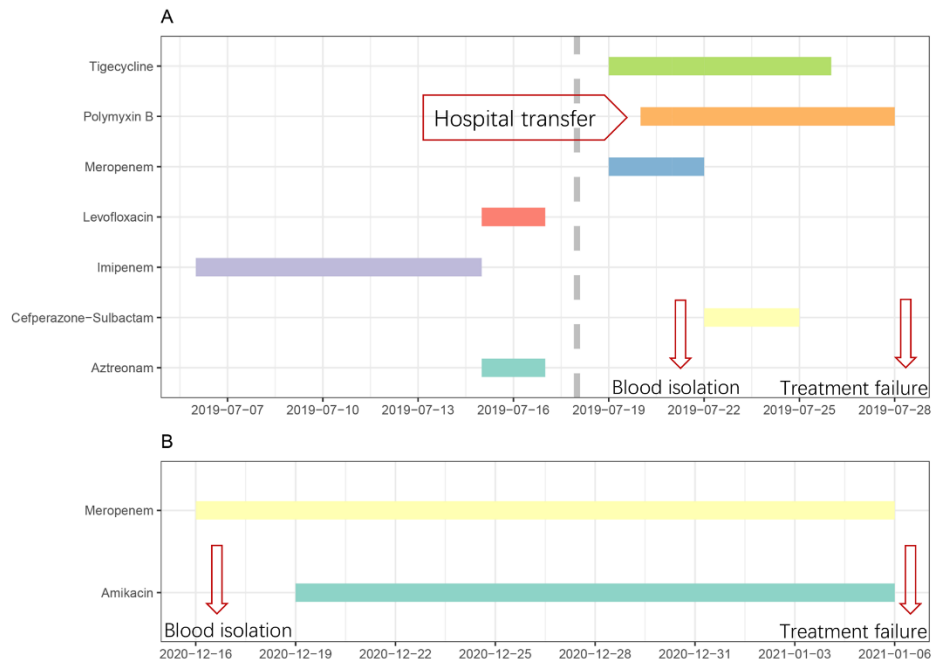

**Figure S2** Antimicrobials treatment during hospitalization for patients infected by *K. pneumoniae* AR8416 and AR8538.

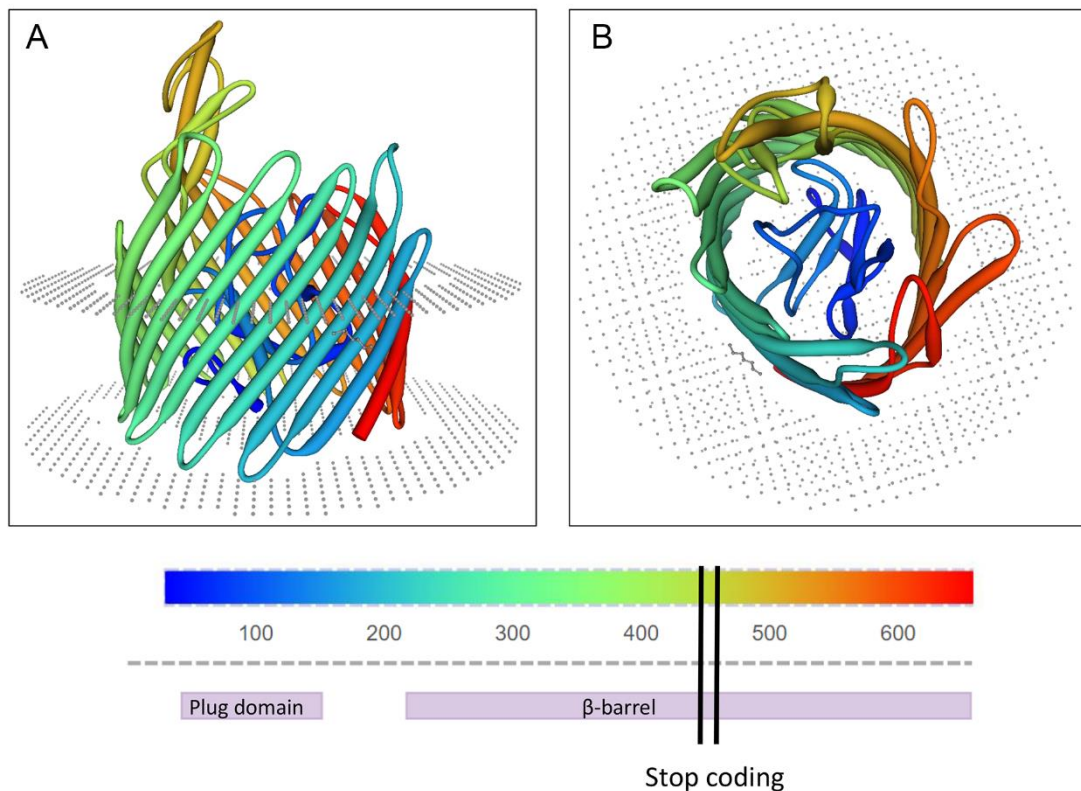

**Figure S3** Structure of CirA and its deficiency. (A) side view (B) top (extracellular) view. The plug domain is indicated with blue and the rest was  $\beta$ -barrel. An early stop codon occurs at position 444 of CirA. The CirA structure was modeled by SWISS-MODEL (<https://swissmodel.expasy.org/>).

| <b>Table S1</b> Primers used in this study |                       |                       |
|--------------------------------------------|-----------------------|-----------------------|
| Primer name                                | Sequences (5'-3')     | Usage                 |
| NDM5-full-F                                | TGGCTTTTGAAACTGTCGCA  | Cloning               |
| NDM5-full-R                                | GATGGCAGATTGGGGGTGAC  | Cloning               |
| NDM1-full-F                                | CATGGCATCGAGATCATCCA  | Cloning               |
| NDM1-full-R                                | ACCTCATGTTTGAATTCGCC  | Cloning               |
| KPC2-full-F                                | CAGTCGTCATAACACGCCGC  | Cloning               |
| KPC2-full-R                                | GCGGCCTGATTACATCCGGC  | Cloning               |
| IMP-4-full-F                               | CCGAGGAAAGATCCAATGGC  | Cloning               |
| IMP-4-full-R                               | CAGCAACGATGTTACGCAGC  | Cloning               |
| OXA-48-full-F                              | ATATCAATGATTTTCTGGTGC | Cloning               |
| OXA-48-full-R                              | CTCAGGCTAAAAGTTAACGC  | Cloning               |
| OXA-232-full-F                             | AAATAATGTTACAATGTGTG  | Cloning               |
| OXA-232-full-R                             | CCATATATCTTTACAGCTTA  | Cloning               |
| cirA1-full-F                               | TCGTAGACAGGGTAAGGCGA  | Mutation confirmation |
| cirA1-full-R                               | TATCGATCAGGGCGACAACG  | Mutation confirmation |

|                                                                        |                                                                 |                          |
|------------------------------------------------------------------------|-----------------------------------------------------------------|--------------------------|
| spacer-cirA-stop-F                                                     | <u>TAGTCGACGATGCTGCACGAGCCG</u>                                 | Spacer for cirA mutation |
| spacer-cirA-stop-R                                                     | <u>AAACCGGCTCGTGCAGCATCGTCG</u>                                 | Spacer for cirA mutation |
| donor-cirA-stop-F                                                      | GCTGGTTTCCGGTTTCAGATCCGGGTTACC<br>GACGATGCTGCACGAGCGCGACAGGAGTT | Donar for cirA mutation  |
| donor-cirA-stop-R                                                      | GGCGGCCAGTCAACGTC                                               | Donar for cirA mutation  |
| pCasKP-conf-F                                                          | GGGAAATACAGACCGCCACA                                            | pCasKP confirmation      |
| pCasKP-conf-R                                                          | TGAAGCTGATAGGGGAGCCT                                            | pCasKP confirmation      |
| pSGKP-conf-F                                                           | AGGATTTGCAGACTACGGGC                                            | pSGKP confirmation       |
| pSGKP-conf-R                                                           | TGTGTGGAATTGTGAGCGGA                                            | pSGKP confirmation       |
| AR8416-Plasmid2-F                                                      | CCGGCGAAGTTGTTAAGCTG                                            | Curing confirmation      |
| AR8416-Plasmid2-R                                                      | TTCATCGCTGAGAGGGCTTC                                            | Curing confirmation      |
| AR8416-plasmid3-F                                                      | AATTTCTCCAAAGCCC CGA                                            | Curing confirmation      |
| AR8416-plasmid3-R                                                      | GTCGGCATCGGCCTGATTAT                                            | Curing confirmation      |
| AR8416-plasmid4-F                                                      | GGACGACCATCGAGTTCTGG                                            | Curing confirmation      |
| AR8416-plasmid4-R                                                      | CACTACCTGAGTTCCGCGAC                                            | Curing confirmation      |
| M13-F                                                                  | GTAAAACGACGGCCAG                                                | Cloning confirmation     |
| M13-R                                                                  | CAGGAAACAGCTATGAC                                               | Cloning confirmation     |
| <i>BsaI</i> sites were indicated with underlines for spacer sequences. |                                                                 |                          |

| Isolates Name | Species                           | Cefiderocol MIC (mg/L) | Diagnosis                        | City    |
|---------------|-----------------------------------|------------------------|----------------------------------|---------|
| AR8214        | <i>Klebsiella pneumoniae</i>      | 0.5                    | Acute T lymphoblastic leukemia   | Harbin  |
| AR8215        | <i>Klebsiella quasipneumoniae</i> | 2                      | Acute myelogenous leukemia (AML) | Harbin  |
| AR8217        | <i>Klebsiella pneumoniae</i>      | 0.25                   | Acute lymphoblastic leukemia     | Harbin  |
| AR8221        | <i>Klebsiella pneumoniae</i>      | 0.5                    | Lymphoma                         | Harbin  |
| AR8229        | <i>Klebsiella pneumoniae</i>      | 2                      | Acute myelogenous leukemia       | Wenzhou |
| AR8230        | <i>Klebsiella pneumoniae</i>      | 0.06                   | Malignant B cell lymphoma        | Wenzhou |
| AR8231        | <i>Klebsiella pneumoniae</i>      | 0.25                   | Acute lymphoblastic leukemia     | Wenzhou |
| AR8232        | <i>Klebsiella pneumoniae</i>      | 0.06                   | Acute monocytic leukemia         | Wenzhou |
| AR8234        | <i>Klebsiella quasipneumoniae</i> | 0.06                   | Acute lymphoblastic leukemia     | Wenzhou |

|        |                                   |       |                                |          |
|--------|-----------------------------------|-------|--------------------------------|----------|
| AR8235 | <i>Klebsiella pneumoniae</i>      | 0.25  | Acute myelogenous leukemia     | Wenzhou  |
| AR8236 | <i>Klebsiella pneumoniae</i>      | 0.25  | Acute myelogenous leukemia     | Wenzhou  |
| AR8237 | <i>Klebsiella pneumoniae</i>      | 0.25  | Diffuse large B cell lymphoma  | Wenzhou  |
| AR8287 | <i>Klebsiella quasipneumoniae</i> | 2     | Acute leukemia                 | Jinan    |
| AR8288 | <i>Klebsiella pneumoniae</i>      | 2     | Acute myelogenous leukemia     | Jinan    |
| AR8302 | <i>Klebsiella pneumoniae</i>      | 2     | Chronic myelogenous leukemia   | Hangzhou |
| AR8303 | <i>Klebsiella pneumoniae</i>      | 0.5   | Acute lymphoblastic leukemia   | Hangzhou |
| AR8304 | <i>Klebsiella pneumoniae</i>      | 1     | Acute monocytic leukemia       | Hangzhou |
| AR8305 | <i>Klebsiella pneumoniae</i>      | 0.25  | Acute T lymphoblastic leukemia | Hangzhou |
| AR8308 | <i>Klebsiella pneumoniae</i>      | 4     | Acute monocytic leukemia       | Hangzhou |
| AR8309 | <i>Klebsiella variicola</i>       | 1     | AML with maturation            | Hangzhou |
| AR8310 | <i>Klebsiella pneumoniae</i>      | 4     | Non-Hodgkin lymphoma           | Hangzhou |
| AR8313 | <i>Klebsiella pneumoniae</i>      | 1     | Acute mixed-lineage leukemia   | Hangzhou |
| AR8314 | <i>Klebsiella pneumoniae</i>      | 1     | Acute lymphoblastic leukemia   | Hangzhou |
| AR8315 | <i>Klebsiella pneumoniae</i>      | 1     | Acute lymphoblastic leukemia   | Hangzhou |
| AR8319 | <i>Klebsiella pneumoniae</i>      | 4     | Chronic myelogenous leukemia   | Hangzhou |
| AR8324 | <i>Klebsiella pneumoniae</i>      | 2     | Acute myelogenous leukemia     | Hangzhou |
| AR8325 | <i>Klebsiella pneumoniae</i>      | 4     | Acute B lymphoblastic leukemia | Hangzhou |
| AR8331 | <i>Klebsiella pneumoniae</i>      | 4     | Diffuse large B cell lymphoma  | Hangzhou |
| AR8334 | <i>Klebsiella pneumoniae</i>      | 8     | Acute myelogenous leukemia     | Hangzhou |
| AR8335 | <i>Klebsiella pneumoniae</i>      | 8     | Acute myelogenous leukemia     | Hangzhou |
| AR8336 | <i>Klebsiella pneumoniae</i>      | 4     | Acute myelogenous leukemia     | Hangzhou |
| AR8345 | <i>Klebsiella pneumoniae</i>      | 0.5   | Acute lymphoblastic leukemia   | Hangzhou |
| AR8381 | <i>Klebsiella pneumoniae</i>      | 1     | AML with maturation            | Hangzhou |
| AR8388 | <i>Klebsiella pneumoniae</i>      | 2     | Follicular lymphoma            | Hangzhou |
| AR8393 | <i>Klebsiella pneumoniae</i>      | 0.125 | Acute monocytic leukemia       | Shanghai |
| AR8394 | <i>Klebsiella pneumoniae</i>      | 0.25  | Follicular lymphoma            | Shanghai |
| AR8396 | <i>Klebsiella pneumoniae</i>      | 1     | Acute lymphoblastic leukemia   | Shanghai |
| AR8398 | <i>Klebsiella pneumoniae</i>      | 0.5   | Multiple myeloma               | Shanghai |
| AR8399 | <i>Klebsiella pneumoniae</i>      | 0.25  | Acute B lymphoblastic leukemia | Shanghai |
| AR8403 | <i>Klebsiella pneumoniae</i>      | 2     | Acute myelogenous leukemia     | Shanghai |
| AR8406 | <i>Klebsiella pneumoniae</i>      | 0.5   | Acute lymphoblastic leukemia   | Shanghai |
| AR8407 | <i>Klebsiella pneumoniae</i>      | 0.25  | Diffuse large B cell lymphoma  | Shanghai |
| AR8408 | <i>Klebsiella pneumoniae</i>      | 0.5   | Diffuse large B cell lymphoma  | Shanghai |
| AR8411 | <i>Klebsiella pneumoniae</i>      | 0.25  | Acute lymphoblastic leukemia   | Shanghai |
| AR8412 | <i>Klebsiella pneumoniae</i>      | 1     | Burkitt lymphoma               | Shanghai |
| AR8413 | <i>Klebsiella pneumoniae</i>      | 0.5   | Burkitt lymphoma               | Shanghai |
| AR8414 | <i>Klebsiella variicola</i>       | 0.25  | NK cell lymphoma               | Shanghai |
| AR8416 | <i>Klebsiella pneumoniae</i>      | >256  | Acute lymphoblastic leukemia   | Shanghai |
| AR8419 | <i>Klebsiella pneumoniae</i>      | 0.06  | Diffuse large B cell lymphoma  | Shanghai |
| AR8423 | <i>Klebsiella pneumoniae</i>      | 2     | Diffuse large B cell lymphoma  | Hangzhou |
| AR8424 | <i>Klebsiella pneumoniae</i>      | 2     | Diffuse large B cell lymphoma  | Hangzhou |

|        |                                   |       |                                    |              |
|--------|-----------------------------------|-------|------------------------------------|--------------|
| AR8447 | <i>Klebsiella pneumoniae</i>      | 0.5   | Acute mixed-lineage leukemia       | Guangzhou    |
| AR8452 | <i>Klebsiella pneumoniae</i>      | 0.25  | Multiple myeloma                   | Chengdu      |
| AR8457 | <i>Klebsiella pneumoniae</i>      | 0.125 | Acute lymphoblastic leukemia       | Chengdu      |
| AR8458 | <i>Klebsiella pneumoniae</i>      | 0.25  | AML with maturation                | Chengdu      |
| AR8459 | <i>Klebsiella pneumoniae</i>      | 0.25  | Lymphoma                           | Chengdu      |
| AR8471 | <i>Klebsiella pneumoniae</i>      | 0.125 | Acute monocytic leukemia           | Chengdu      |
| AR8476 | <i>Klebsiella pneumoniae</i>      | 0.125 | Acute T lymphoblastic leukemia     | Shijiazhuang |
| AR8479 | <i>Klebsiella pneumoniae</i>      | 0.5   | Acute promyelocytic leukemia       | Shijiazhuang |
| AR8480 | <i>Klebsiella pneumoniae</i>      | 0.125 | Acute lymphoblastic leukemia       | Shijiazhuang |
| AR8481 | <i>Klebsiella pneumoniae</i>      | 0.5   | Acute myelogenous leukemia         | Shijiazhuang |
| AR8484 | <i>Klebsiella pneumoniae</i>      | 0.5   | NK/T cell lymphoma                 | Shanghai     |
| AR8487 | <i>Klebsiella pneumoniae</i>      | 0.25  | Acute myelogenous leukemia         | Hangzhou     |
| AR8488 | <i>Klebsiella pneumoniae</i>      | 0.25  | Acute lymphoblastic leukemia       | Hangzhou     |
| AR8489 | <i>Klebsiella pneumoniae</i>      | 0.125 | Acute myelogenous leukemia         | Hangzhou     |
| AR8490 | <i>Klebsiella pneumoniae</i>      | 0.25  | Non-Hodgkin lymphoma               | Hangzhou     |
| AR8498 | <i>Klebsiella pneumoniae</i>      | 0.25  | Acute T lymphoblastic leukemia     | Shenyang     |
| AR8499 | <i>Klebsiella pneumoniae</i>      | 0.25  | Chronic myelomonocytic leukemia    | Shenyang     |
| AR8500 | <i>Klebsiella pneumoniae</i>      | 0.5   | Acute lymphoblastic leukemia       | Shenyang     |
| AR8507 | <i>Klebsiella pneumoniae</i>      | 2     | AML with maturation                | Hangzhou     |
| AR8508 | <i>Klebsiella pneumoniae</i>      | 0.5   | Acute lymphoblastic leukemia       | Hangzhou     |
| AR8509 | <i>Klebsiella pneumoniae</i>      | 4     | AML with maturation                | Hangzhou     |
| AR8510 | <i>Klebsiella pneumoniae</i>      | 2     | Acute myelogenous leukemia         | Hangzhou     |
| AR8513 | <i>Klebsiella pneumoniae</i>      | 1     | Acute lymphoblastic leukemia       | Hangzhou     |
| AR8514 | <i>Klebsiella pneumoniae</i>      | 1     | Acute mixed-lineage leukemia       | Hangzhou     |
| AR8518 | <i>Klebsiella pneumoniae</i>      | 2     | Acute lymphoblastic leukemia       | Hangzhou     |
| AR8523 | <i>Klebsiella pneumoniae</i>      | 1     | Acute myelogenous leukemia         | Hangzhou     |
| AR8529 | <i>Klebsiella pneumoniae</i>      | 2     | Multiple myeloma                   | Suzhou       |
| AR8530 | <i>Klebsiella pneumoniae</i>      | 2     | Angioimmunoblastic T cell lymphoma | Suzhou       |
| AR8531 | <i>Klebsiella pneumoniae</i>      | 2     | Acute lymphoblastic leukemia       | Suzhou       |
| AR8532 | <i>Klebsiella pneumoniae</i>      | 1     | Acute leukemia                     | Suzhou       |
| AR8533 | <i>Klebsiella pneumoniae</i>      | 2     | Acute myelogenous leukemia         | Suzhou       |
| AR8534 | <i>Klebsiella pneumoniae</i>      | 0.5   | Acute leukemia                     | Suzhou       |
| AR8535 | <i>Klebsiella pneumoniae</i>      | 1     | Acute lymphoblastic leukemia       | Suzhou       |
| AR8537 | <i>Klebsiella pneumoniae</i>      | 0.5   | Acute B lymphoblastic leukemia     | Suzhou       |
| AR8538 | <i>Klebsiella quasipneumoniae</i> | 32    | Acute lymphoblastic leukemia       | Suzhou       |

All the strains were identified as *K. pneumoniae* via matrix-assisted laser desorption/ionization mass spectrometry and then verified by Kleborate with genome data. All the strains belong to *K. pneumoniae* species complex <sup>1</sup>.

## Reference

1. Wyres KL, Lam MMC, Holt KE. Population genomics of *Klebsiella pneumoniae*. *Nat Rev Microbiol* 2020.
